# Supplementary material
Source: PubMed Central journal article supplement (PMC4995143)
Supplement: NIHMS762665-supplement.pdf [file NIHMS762665-supplement.pdf]

## Medication for Attention-Deficit/Hyperactivity Disorder and Risk for Depression: A Nationwide Longitudinal Cohort Study

### *Supplemental Information*

**Table S1.** Baseline characteristics of ADHD patients with and without medication

|                                            | <b>Men Without<br/>Medication<br/>(n = 12,786)</b> | <b>Men With<br/>Medication<br/>(n = 13,463)</b> | <b>Women Without<br/>Medication<br/>(n = 6507)</b> | <b>Women With<br/>Medication<br/>(n = 5996)</b> |
|--------------------------------------------|----------------------------------------------------|-------------------------------------------------|----------------------------------------------------|-------------------------------------------------|
| Age in 2006                                |                                                    |                                                 |                                                    |                                                 |
| 8-15                                       | 5407 (42.3%)                                       | 7554 (56.1%)                                    | 2224 (34.2%)                                       | 2095 (34.9%)                                    |
| 16-25                                      | 4499 (35.2%)                                       | 3306 (25.6%)                                    | 2172 (33.4%)                                       | 1926 (32.1%)                                    |
| 26-35                                      | 1643 (12.8%)                                       | 1375 (10.2%)                                    | 1150 (17.7%)                                       | 970 (16.2%)                                     |
| 36-46                                      | 1237 (9.7%)                                        | 1228 (9.1%)                                     | 961 (14.8%)                                        | 1005 (16.8%)                                    |
| Civil status in 2006                       |                                                    |                                                 |                                                    |                                                 |
| Unmarried                                  | 6599 (51.6%)                                       | 5271 (38.8%)                                    | 3299 (50.7%)                                       | 2988 (49.8%)                                    |
| Married                                    | 424 (3.3%)                                         | 389 (2.9%)                                      | 537 (8.2%)                                         | 483 (8.1%)                                      |
| Divorced                                   | 347 (2.7%)                                         | 299 (2.2%)                                      | 442 (6.8%)                                         | 421 (7.0%)                                      |
| Widowed                                    | 9 (0.1%)                                           | 4 (<0.1%)                                       | 5 (0.1%)                                           | 9 (0.1%)                                        |
| Younger than 16 years old                  | 5407 (42.3%)                                       | 7554 (56.1%)                                    | 2224 (34.2%)                                       | 2095 (34.9%)                                    |
| Employed in 2006                           |                                                    |                                                 |                                                    |                                                 |
| Yes                                        | 1808 (14.1%)                                       | 1305 (9.7%)                                     | 1132 (17.4%)                                       | 927 (15.5%)                                     |
| No                                         | 5571 (43.6%)                                       | 4604 (34.2%)                                    | 3151 (48.4%)                                       | 2974 (49.6%)                                    |
| Younger than 16 years old                  | 5407 (42.3%)                                       | 7554 (56.1%)                                    | 2224 (34.2%)                                       | 2095 (34.9%)                                    |
| In school in 2006                          |                                                    |                                                 |                                                    |                                                 |
| Yes                                        | 2403 (18.8%)                                       | 1923 (14.3%)                                    | 1380 (21.2%)                                       | 1268 (21.2%)                                    |
| No                                         | 4976 (38.9%)                                       | 3986 (29.6%)                                    | 2903 (44.6%)                                       | 2633 (43.9%)                                    |
| Younger than 16 years old                  | 5407 (42.3%)                                       | 7554 (56.1%)                                    | 2224 (34.2%)                                       | 2095 (34.9%)                                    |
| Living in a metropolitan area<br>in 2006   | 1801 (14.1%)                                       | 1722 (12.8%)                                    | 900 (13.8%)                                        | 823 (13.7%)                                     |
| Other psychiatric disorders<br>before 2006 | 4439 (34.7%)                                       | 4512 (33.5%)                                    | 2268 (34.8%)                                       | 2357 (39.3%)                                    |
| Depression in 2009                         | 886 (6.9%)                                         | 643 (4.8%)                                      | 878 (13.5%)                                        | 580 (9.7%)                                      |
